# Supplementary material
Source: ML conference proceedings conference paper supplement (https://openaccess.thecvf.com/content/CVPR2021/html/Yuan_STaR_Self-Supervised_Tracking_CVPR_2021_paper.html)
Supplement: Supplementary file 2 [file Yuan_STaR_Self-Supervised_Tracking_CVPR_2021_supplemental.zip]

Archive with 3 entries (3 files):
- 10046_supp.pdf
- __MACOSX/._10046_supp.pdf
- 10046_supp_video.mp4
